# Supplementary material for: Ce3+ ion regulated CoNi-hydroxides for ultrahigh charge rate supercapacitors
Source: Royal Society of Chemistry journal article supplement (doi:10.1039/d3ce00180f), 2023-01-01
Supplement: d3ce00180f1.pdf [file d3ce00180f1.pdf]

## Supporting Information

### **Ce<sup>3+</sup> ion regulated CoNi-hydroxides for ultrahigh rate supercapacitors**

*Fei Liu<sup>a</sup>, Mengying Zhao<sup>b</sup>, Kunfeng Chen<sup>b,\*</sup>, Mei Hu<sup>a,\*</sup>, and Dongfeng Xue<sup>c,\*</sup>*

<sup>a</sup> Wuhan Institute of Marine Electric Propulsion, CSSC, Wuhan 430064, China

<sup>b</sup> Institute of Novel Semiconductors State Key Laboratory of Crystal Materials  
Shandong University, Jinan 250100, China

<sup>c</sup> Multiscale Crystal Materials Research Center, Shenzhen Institute of Advanced  
Technology Chinese Academy of Sciences, Shenzhen 518055, China

\*E-mail: kunfeng.chen@sdu.edu.cn; humei712@126.com; df.xue@siat.ac.cn

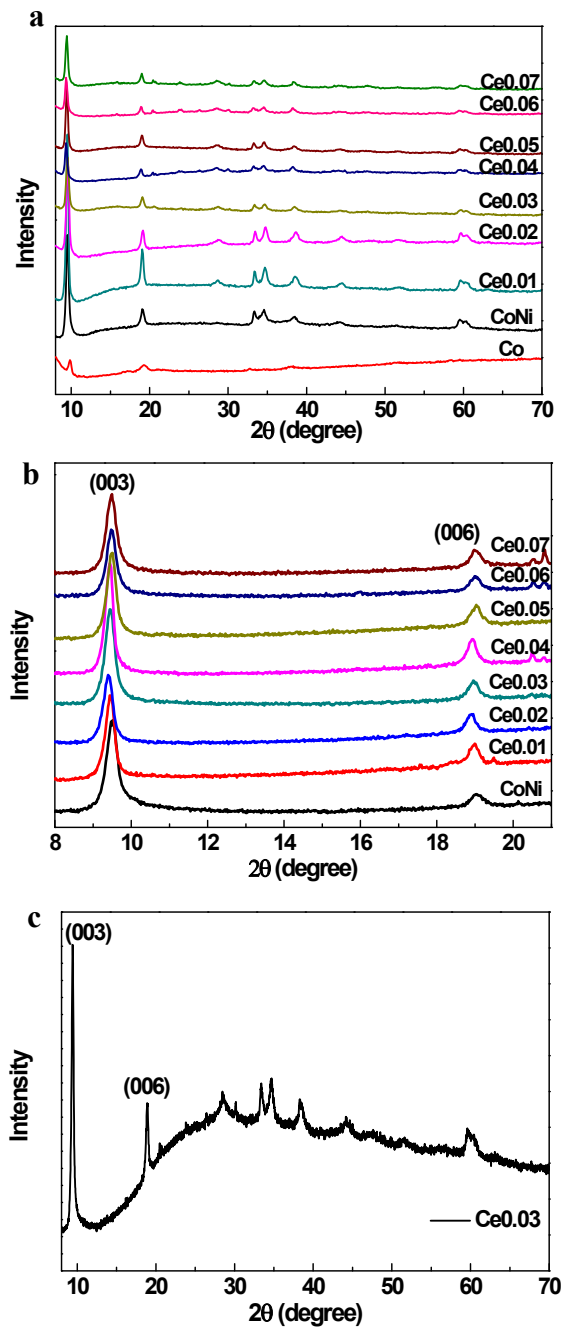

Figure S1 XRD patterns (a, b, c) of  $\text{Ce}^{3+}:\text{CoNi}$  LDH samples.

Table S1  $\text{Co}^{2+}/\text{Ni}^{2+}$  and  $\text{Ce}^{3+}/(\text{Co}^{2+}+\text{Ni}^{2+})$  mol ratio in  $\text{Ce}^{3+}:\text{CoNi}$  LDH samples obtained from ICP and EDS, respectively.

| No.    | $\text{Ce}^{3+}/(\text{Co}^{2+}+\text{Ni}^{2+})$<br>ratio from ICP | $\text{Co}^{2+}/\text{Ni}^{2+}$ ratio<br>from ICP | $\text{Ce}^{3+}/(\text{Co}^{2+}+\text{Ni}^{2+})$<br>ratio from EDS | Co/Ni ratio from<br>EDS |
|--------|--------------------------------------------------------------------|---------------------------------------------------|--------------------------------------------------------------------|-------------------------|
| CoNi   | 0                                                                  | 1.38                                              | 0                                                                  | 1.32                    |
| Ce0.01 | 0.022                                                              | 1.12                                              | 0.012                                                              | 1.02                    |
| Ce0.03 | 0.076                                                              | 1.20                                              | 0.034                                                              | 1.32                    |
| Ce0.05 | 0.115                                                              | 1.12                                              | 0.046                                                              | 1.02                    |
| Ce0.07 | 0.166                                                              | 0.900                                             | 0.154                                                              | 0.901                   |

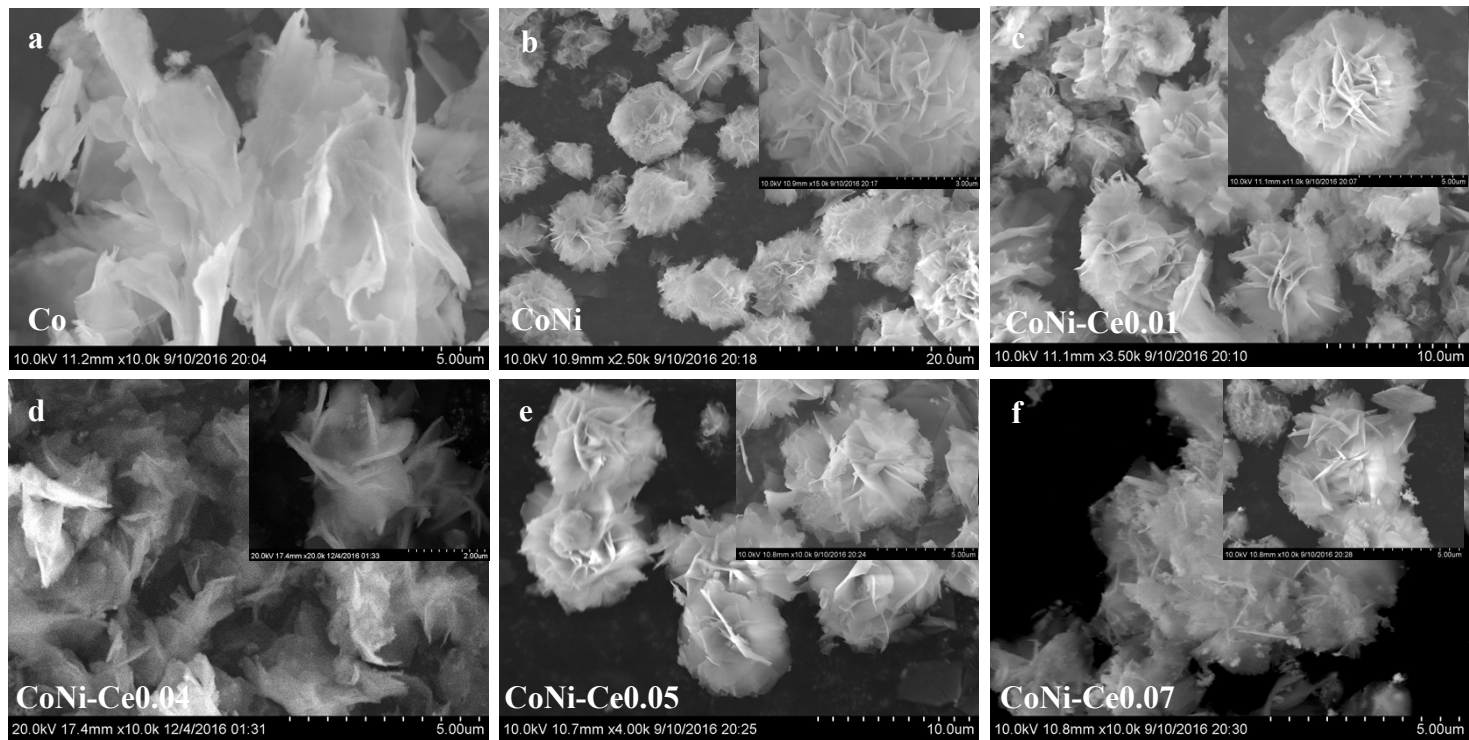

Figure S2 SEM images of (a)  $\text{Co}(\text{OH})_2$ , (b)  $\text{Ce}^{3+}$  unadded and (c-f) added CoNi-LDHs samples.

Table S2 Specific capacitances of Ce<sup>3+</sup>:CoNi-LDHs.

| No.           | Specific capacitance<br>F/g at 1A/g (0.5 V) | Specific capacitance<br>F/g at 50A/g | Capacitance<br>retention % |
|---------------|---------------------------------------------|--------------------------------------|----------------------------|
| Co            | 289                                         | /                                    | /                          |
| CoNi          | 1322                                        | 280                                  | 21                         |
| Ce0.01        | 1381                                        | 780                                  | 56                         |
| <b>Ce0.03</b> | <b>1293</b>                                 | <b>1000</b>                          | <b>77</b>                  |
| <b>Ce0.04</b> | <b>1194</b>                                 | <b>739</b>                           | <b>62</b>                  |
| Ce0.05        | 1117                                        | 740                                  | 66                         |
| Ce0.06        | 1033                                        | 528                                  | 51                         |
| Ce0.07        | 1069                                        | 690                                  | 64                         |

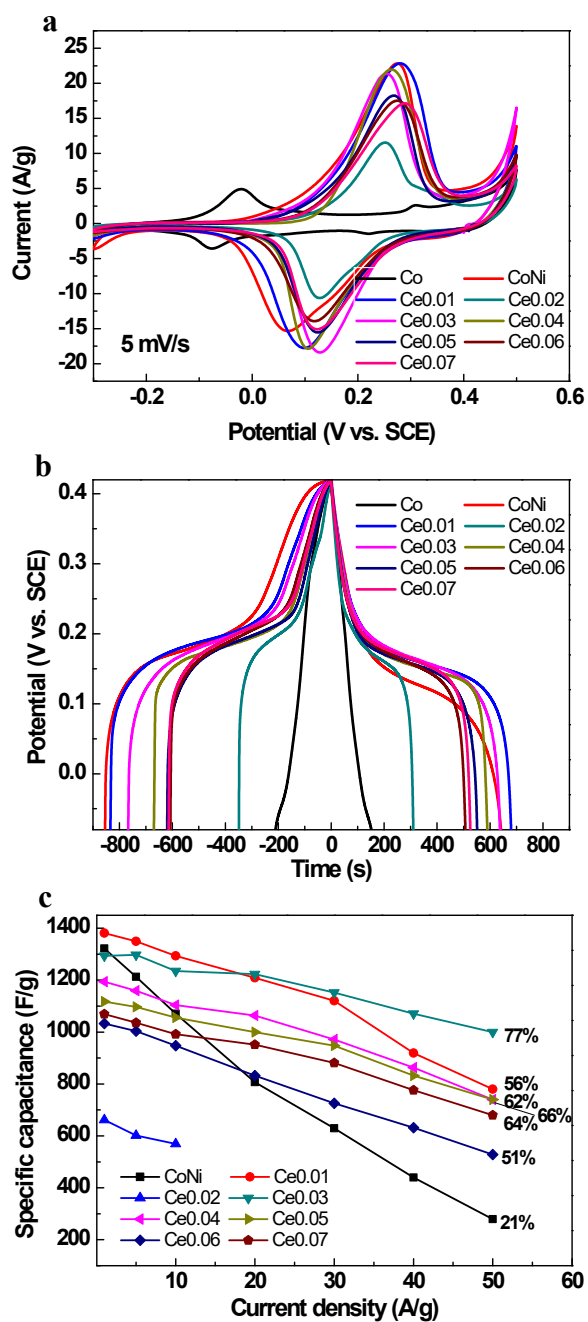

Figure S3 (a) CV curves of Ce<sup>3+</sup>:CoNi-LDHs at the scan rate of 5 mV/s. (b) Charge-discharge curves of Ce<sup>3+</sup>:CoNi-LDHs at the current density of 1 A/g. (c) Specific capacitance Vs. current density.

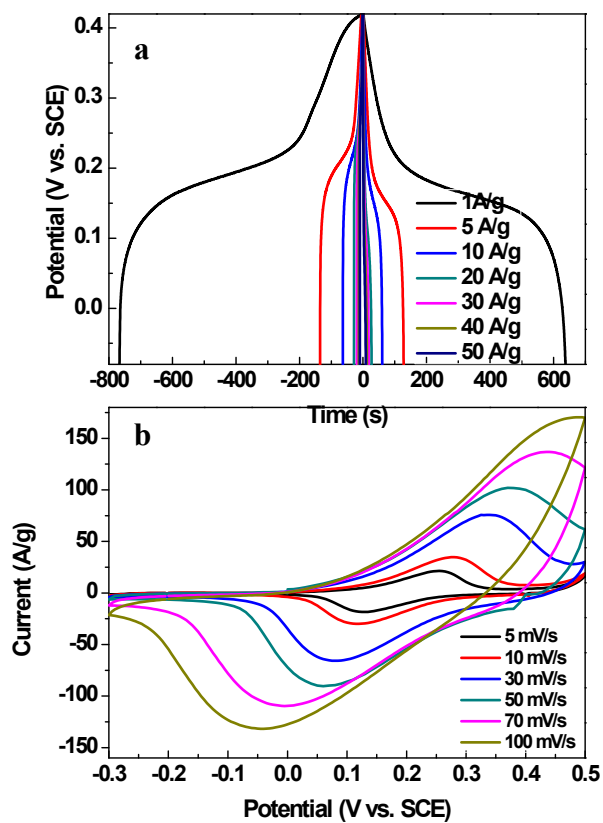

Figure S4 (a) Charge-discharge curves, (b) CV curves of Ce<sup>3+</sup>:CoNi-LDHs samples with adding 0.03 mmol Ce<sup>3+</sup> (marked as Ce0.03).
